# Supplementary material for: A New Expression System Based on Psychrotolerant Debaryomyces macquariensis Yeast and Its Application to the Production of Cold-Active β-d-Galactosidase from Paracoccus sp. 32d
Source: MDPI journal article supplement (doi:10.3390/ijms231911691), 2022-10-02
Supplement: s1 [file s1]

1 tgggtgcatac gtcagtctgg gtgtgtagtc acagcaatcg cagccaaaat gggctcatct  
61 gccacatggg tctcttcgct gcgtcagacg gcccttaatt tcatccagaa acttccatat  
121 tggccctgca atacaattga gtcccttgat tgtttttctc gccctcgtac ggcgtagtgc  
181 cgtcgagtac gctctgcgac acattcogcat ctacaatttt tcacagccat aattcaggga  
241 ccttttttga tactgggtca tttcaaatga gacaactcgc tttccaaccc catataaccg  
301 tctatctact tcatgggtca tcatgcattt gtttccaact ttctacacct atttggttaa  
361 caatagtact aatattgcta taggtgtaga tcagagaact ctccagcgta aatttcagaa  
421 cctatgagaa attttttttc aggaaaaatt ttctatgaga ctcatctctg ggctccttgt  
481 tggatcttta tataaggaac actagaatcc cttaattttt aattgaatta caaaaatttt  
541 tttotataca tatactctat atattaatta atcaaatgg gtaaagaaaa gactcacgtt  
601 aatctcgttg tcattgggtca cgtcgtattct ggtaaatcta ctaccaccgg tcaacttaatt  
661 tacaagtgtg gtggtatcga taagagaacc attgaaaagt tcgaaaagga agccgctgaa  
721 ttaggtaagg gttctttcaa gtacgcctgg gtttttagaca agttaaaaggc tgaaagagaa  
781 agaggatatca ccattgatat cgctttatgg aagttcgaaa ctccaaagtt ccacgtcacc  
841 attattgatg ctccagggtca cagagatttc atcaagaaca tgattactgg tacttcccaa  
901 gctgattgtg ctattttgat tattgctggg ggtattgggt aattcgaagc oggtatctcc  
961 aaggatgggc aaaccagaga acacgcttta ttagcttaca ccttaggtgt taagcaattg  
1021 attgttgcta tcaacaagat ggactctgtc aaatgggaca aggccagatt cgacgaaata  
1081 gtcaaggaaa cctctaactt cgtcaagaag gtcggtttca acccaaagag tgttccattc  
1141 gtcccaatct ctggttgga cggtgacaac atgattgagc catcctctaa ctgtccatgg  
1201 tacaaggggt gggaaaagga aaccaaggct ggtaagtcct ctggtaagac tttgttagaa  
1261 gctattgatg ctatogaacc accaaccaga ccaactgaca aggctttaag attaccattg  
1321 caagatgtct acaagatcgg tggattggg actgtgccag tcggtagagt tgaaaccggg  
1381 atcatcaagg ccggtatggg tgtcaccttc gcccagctg gtgttaccac tgaagtcaag  
1441 tccgttgaaa tgcatacga acaattaacc gaaggtgttc caggtgacaa cgttggtttc  
1501 aacgtcaaga atgtttccgt taaggaaatc agaagaggta acgtctgtgg tgactccaag  
1561 aacgaccac caaagggtgc tgactcttc accgctcaag ttattgtctt aaaccatcca  
1621 ggtcaaatct cctctgggta ctctccagtc ttagattgtc acactgctca cattgcttgt  
1681 aagttcgaca ctttaatcga aaagattgac agaagaactg gtaagaagtt agaagacaac  
1741 cctaagttca tcaagtctgg tgatgctgct attgtcaaga tgggtccatc taagccaatg  
1801 tgtgttgaa ctttcaactga ctaccacca ttaggttagat tcgctgtgag agatatgaga  
1861 caaactgttg ctgtcgggtg tatcaagtct gttgaaaagt ctgacaagtc cggtaagggt  
1921 actaaggctg ctcaaaaggc tgctaagaaa taagctcctt aatttgaaat tgtccgggag  
1981 aagctacttg aatttgaatt acgtaaattt cgagtttttt ccctacagtt agaattctgt  
2041 ttattttgat aagtaatttt atactttaat gtttaatagt tgatctaac gctcctttgt  
2101 aggaacctat ccaatttgaa cgcaaatctt attcggactg cagtatacac agttcccggt  
2161 gacctcaatc gtccgatatt atgtccaaca tcagtogatg ccataaacac aaaagccgtc  
2221 cgaaaaattt ccttatcaag ccacatgtga aaagtctgct tcaatgacga gtcaagatc  
2281 tgataagccc accaaactta tattaagatc cctgttatat gaagttccat ttttcacata  
2341 ttctttaaca cagctgggtac cctcaactgt ttcaaaactt gagatggatt agtattgcgt  
2401 tattgttagt agaaaagtta gtgaaaaatc atcattgaac cgagtcataa tctggggaaa  
2461 cagagtcagt aaaaatccgt gttaaatatt tttcattgac tctgagtggg acaactttcg  
2521 tattagccta tgaagtattt aaaccatoga gaatcctttt aaaatgacaa taaagtattt  
2581 ttaatatcat tcatcttttg ataaatacaa tataatcata gaatttaattt tttttgtttt  
2641 ataaaccaa aaaaaataga gaaggatgat ttcaagagtt gttgcaagat cggctcgtgc  
2701 taatagattg tttacottga ccagatctgt tccaaaggta tacaatttga acttgaaaat  
2761 tgcatacagt agcagatttt tagcttcaaa ggccgacaca tcatcagcag attatgaaaa  
2821 agtttacgat ccaagtgcga agactgtgtc ttggggcaat ttggatacgt tcgccagacg  
2881 tcatcttggt ctaacctgtg acaatgctca gacgatgttg agtaccttgg gatacaagga  
2941 tttggacgag tttttgagca aagccatccc agagcacggt ttatacaaaa gggcattaca  
3001 gattcaacca caacaagggt acactgagct ggaaatgttg gaacatttgc aaaaattggc

Figure S1: Nucleotide sequence of the *D. macquariensis* strain D50 *TEF1* gene (bold text) with 5' and 3'-flanking regions. The putative promoter sequence is red.



```

1 cactactcag acttaccacc gcatatacag acattaacca taatagtgcc atctacaggg
61 cacaatgcat ttaatacaca atctaataata cagcttaagt agagcccatc tgtaattaaa
121 cccacacaaa gagtaattca gtcacatata ctaatgtgaa cggcattcat ttgacctagt
181 gtcaacatgg caaaagcttc cgcgcagtt tcgcaatttc actacatgtc gctgtcatc
241 agctacgaac tgotatgtaa gatcaactgc aaaatgttcc actggtccat aatcgaagtt
301 tctaggagtt tgccaaaaaa tttagtccca tactatccca accaaatgtc ctcaaataac
361 taccatcaca cctatttttgc caagttcttc ctatctacta tatagctact tcatgctgct
421 tgcaataccg tagtctacgg ccatagcaact tggattctga atacttagag gaaataggg
481 aaagccctat cgggttaaata taaatatttg tctgtctgaa aaaaaaaatt tcgccacgac
541 accctctgat gaatggaacg caattggctc tgcaaaaatt tataaggaa taaattgaag
601 aacttctttt tcttctctct tttttcaata cagtatacta ttattatata ttaaaccaaa

661 tgggtaaaga aaagactcac gttaatcttg ttgtcattgg tcacgtcgat tccggtaaata
721 ctaccactac cggctactta atttacaagt gtggtggtat cgataagaga actattgaaa
781 agttcgaaaa ggaagccgct gaattaggta agggttcttt caagtacgct tgggttttag
841 acaagttaaa ggctgaaaga gaaagaggta tcaccattga tatcgcttta tggaggttcg
901 aaactccaaa gttccacgct accattattg atgctccagg tcacagagat ttcacaaaga
961 acatgattac tggtaacttc caagctgatt gtgctatttt gattattgct ggtggtattg
1021 gtgaattcga agctggtatc tccaaggatg gtcaaaccag agaacacgct ttattagctt
1081 acaccttagg tgtaagcaa ttgattgttg ctatcaacaa gatggactct gtcaaagggg
1141 acaaggccag attcgacgaa atcgtaagg aaacctctaa ctctcgtaag aaggctcggtt
1201 tcaacccaaa gagggttcca ttcgtcccaa tctctggttg gaacggtgac aacatgattg
1261 aaccatcatc taactgtcca tggtaacaagg gttgggaaaa ggaaaccaag gctggttaagt
1321 cctctggtta gactttgtta gaagctattg atgctatoga accaccaacc agaccaactg
1381 acaaggcttt aagattacca ttgcaagatg tctacaagat cgggtggtatt ggtactgtgc
1441 cagtcggttag agttgaaacc ggtattatca aggcgggtat gggtgtcacc ttgcgccag
1501 ctggtgtcac cactgaagtc aagtcggtt aaatgcatca cgaacaatta accgaagggtg
1561 ttccagggtga caacgttggt ttcaacgtca agaacgttcc cgtaaggaa atcagaagag
1621 gtaacgtctg tgggtgactcc aagaatgacc caccaaaggg tgctgactct ttcaccgctc
1681 aagttattgt cttaaaccat ccagggtcaaa tctcctctgg ttactctcca gtcttagatt
1741 gtcacacagc tcacattgct tgtaagttcg acactttaat cgaaaagatt gacagaagaa
1801 ctggtgaagaa gttagaagac aaccctaaat tcatcaagtc tgggtgatgt gctattgtca
1861 agatgggttc atctaagcca atgtgtgttg aagctttcac tgactacca ccattaggta
1921 gatcgctgt cagagatatg agacaaactg ttgccgtcgg tggtatcaag tctgttgaga
1981 agtctgacaa gtccggtaag gttaccaagg ctgctcaaaa ggctgctaag aaataagctg
2041 attaatgtag aattttatat tggttacttg ttttatatta ggctttttga atacatatga
2101 actttaaaaa tgattgtagc ctccgataag cactagctta ttgtctctgt aaatcgttat
2161 gtggcggtggc caagtatctg gcgcagtcac atttatcgct aaagactatt taatagaatt
2221 tgaacttcac actggcgaac cctactagtt aaacgacttt tatacttttc tccgagtaat
2281 aacaaagaac gtacctgacg ttataatcaa catatgcoat atcacctct aggtccttag
2341 gtattaatta atagcatggt gaaaattttt ttagcacaat agatactgta tacaaccaga
2401 tatcatgttc aactggaaat agatacagtt aaatgaactt tggtgataga gggctctatt
2461 gacatagaac cgtgttgacg ataagc

```

Figure S2: Nucleotide sequence of the *D. macquariensis* strain D50 *IEF2* gene (bold text) with 5' and 3'-flanking regions. The putative promoter sequence is pink.



```

1  tcgtacgtta cattaataac actcctatat atgaagtaga ccaattcttt aacactgtga
61  ocaacatcgt ttctgtacgt ctattggctg aattcgccga aatatacata ctctctgtat
121 atggtcagaa tcttcacatc ggtgttatta ggcgacaccg aaacccttaa acccccgtt
181 cgcactcggc cggctcgtgc tgggtaacaa atgcgttacg ctacacccat tcgctaaatc
241 caaacgtcat tocataggtc gggtcgcacg aaagcctcac ttccgcacac cacatccatt
301 catcaggatc tgaacttcgcg cagacgtcat cgaccctcgg ggctcgtgtt cgggtcttcgc
361 ttcaatccca ggggtgcgcg tctttttccc ctctcccggg cgacctatca taccacaatt
421 caagacggcc cttatgtgcc tgtttcccaa cgtgtcctta tcagttcata atcgccacct
481 ggttgtgtct caatcgccag atttaccggg tctcctaaat tgcgectaca tttgtcgttc
541 tcacgtcctg tgcctccttt ctacatggac gagttgctgc caacgacct ttttcacggg
601 atcaagtggg ggttagcctc cgggcgaccc tggacggctc gcttcogttg atccttccat
661 actaattaac ggctcgggac tttgtagcgc cgaaatcatg agaataacca aactcccggc
721 aactagctcg gtcgtgcccg gcaccggggc ctctatggga ttcttcgccc cgggagtcga
781 gcaataagaa catagtggaa aattataaat atgagtaatt cgccgtgcaa tcgacatgga
841 gtatatatta aagggttatct tattattcaa ttgaatataa ttaactagta agaataatta
901 ataattaaac atggctatca ctattgggat taacggtttc ggtcgtattg gacgtttagt

961 cttaaagagtc gcttttagaaa gatctgacat caaggttggt gccgtcaatg atccattcat
1021 tgcgctgaa tacgtcgtt acatgttcaa gtacgattct actcacggta gatacaaggg
1081 tgatgtaagc tccaaggacg acaccttagt catcgacggg caatctatca aggttttcgg
1141 tgaaagagac ccagcctcga ttccatgggg taaggctcggg gttgactacg tcatcgaatc
1201 caccgggtgc ttcaccacta tggaagggtc tcaaaagcac attgacggtg gtgccaagaa
1261 ggtcattatc actgctccat cctcagatgc tccaatgttc gttgttggtg ttaacgaaca
1321 aaaatacacc ccagacttga agattgtttc caacgcttct tgtactacta actgtttggc
1381 tccattagcc aagggttatca acgacacctt cgggtattgaa gaaggtttaa tgaccactgt
1441 ccaactccatc actgccaccc aaaagaccgt tgatgggtcca tcccacaagg actggagagg
1501 tggtagaacc gcttctggta acattatccc atcttccacc ggtgctgcca aggcggctcg
1561 taaggttatt ccagaattaa acggttaagt gaccggtatg tctttgagag ttctactagt
1621 cgatgtttca gttgttgatt taaccgtcag attgaagaaa cctgctacct acgaagaaat
1681 ctccgaagct atcaagtctg cttctaacgg tgaattaaag ggtgtcttag gttacactga
1741 agatgctgtt gtttccaccg atttcttagg ttccagctac tcttctatct tcgatcaaaa
1801 ggccgggtatc ttattatccc caaccttctg caagttgatc tcttggtacg ataacgaatt
1861 cggttactcc accagagttg tcgatttatt agaacacgtc gccaaaggct ctaattaaact

1921 agccgaccct aaactataat ttatttatgg tttatcgtcc ctacatata tatgcgcaat
1981 aaaatgtatt tattttaaca ttaaaacact tgtatatgta gcgagtttg catgtatgtg
2041 aattcttagg ctcgtagggg tttccaaccg tagctggtgt aggtgtgatg tacttttaaa
2101 ctatattaac cgttctaata tcttgtgcgt atttatttgt aaatattcac atatttgttt
2161 aaattctata catatacatt atcactatca catacattat cactattata tacacagtgc
2221 atatttccct attacctaaa tttgacactg ctctcgttg ttacaacggg ttctcttcat
2281 ggacaaatta tttctagatc aaacattcaa attatacaaa tcaaatgata ctgtacctca
2341 cttgactcaa caacaattgg actatatctc aacaataaca tgtcaatatt tattccaac
2401 gttggttaat gatatgatat cagattacag atcatttgag gatttactcc tagattttaa
2461 aatcactcat agctcgagac agtttaatca atttacaatc acatatattt ccataagaca
2521 caagggatta ttgcctcgac aaaccataat attcatcaaa gctactgata ctaacgacaa
2581 cgcacatca ttcaatacgt tggatgatgt aaaaacaacg aactcatcct tattaaggat
2641 tctaattcag gcgattgaaa atctacctac agaagtccc ataatagtac gggaattaaa
2701 attcaacgag aaatatctca acttaattat aaataatgta tctaacagct tattatctat
2761 agataattat gctgaggtca taggtgacgt tgaattgatt tatcaaaacta gccacctcgt
2821 atcgaacgat tcattaagaa acatcatcat caatattccc gaaaaagatg taagtattat
2881 atcggattcc aaaggactca ttaataacgt caatgatttc ttgaaacaaa cgagcctggt
2941 aaattttaat aacctacctt tgattcgggt cacttcaagg

```

Figure S3: Nucleotide sequence of the *D. macquariensis* strain D50 *GAP* gene (bold text) with 5' and 3'-flanking regions. The putative promoter sequence is green.

```

1  aggaattaca aatagaagcc ataaatatat tcattcctgt atataaatat tagccaataa
61 aattgcattc gttaacaatt atgagaaaatt tttcaccttg attggaacat atataaaagg
121 aagctttctg gcccgattca aaacaagttg ttaattccca taatataatc ttttatattt
181 taaccagggt tcttaacata tatcatgcca gctccatttg aaaaagggtc cgaaaagaag
241 ggtgctaact tatttaaaac cagatgttta caatgtcaca ctggtgaaga aggtggtcca
301 cacaagggtg gtccaaactt acacggtatt attggtagaa catctggtca agccgctggt
361 tactottaca ctgatgccaa taaaaagaag ggtgttcaat ggactgaaca aactttatcc
421 gactacttgg aaaacccaaa gaaatatatc ccaggtacca agatggcctt cggtggttta
481 aagaaaccta aggacagaaa cgatttgatc acctatatag ccgaagctac caaataaacc
541 atttattaga tgttgaaaag tttactcgtc gttttgtaca aacactgttt aatgggcctc
601 gaatttagct agttacacat ttatctgtat atacatgaat aatattaacg aacgatgtta
661 gattaaatgc ttacagtaga gtacaagcag tgggggttat atttgatgg acattatctg
721 ttcacgtgac ccagtatgag tgaaaagttc gccaaagtaa ccactgtatt acagacggca
781 attatattac aattagtggc aac

```

Figure S4: Nucleotide sequence of the *D. macquariensis* strain D50 *CYC1* gene (bold text) with 5' and 3'-flanking regions. The putative transcriptional terminator sequence is purple.



```

1 atattttatta aaagaaaaga aatagatcaa gattaatcca aggttggtta aaagaagaca
61 agacatgtaa cgagttgaat tttataataa aaaaagaaaa tatatgattt aaagtataca
121 tgaatttgta gaaggtatgc gtttagaaag gagctgaagt taacgagatg cattcaattt
181 caaagacaga gagttcttac atttatctta gacgaattag gatgcttcac tgtagtagat
241 ttctctgatt tgggtcatgg gttgctttat tgttgcaaaa tagtggggga gaggggaaga
301 ggaaagataa acattatatg caggtcactt aaacacttga taaagtcatc ataaaaacaac
361 ctaaatacaac tatttgagtc caaaatttta cataaattac ataaattact ttttgaaatt
421 ctttcaatat acagttcaaa taataaaaaat tagggtttagc gtagataaaa cgaatattgt
481 aggtttatgt tgggcggtaa attacacaaa gttgagaaga taagatgcgc taaaaagtga
541 aaaaaataaa aaattattga tctgaagatt tttttttttg gagatttcgg aaaattttga
601 ggtctcatcg acttatcgat ccgccaagt gtaacctaaa tagtgaaacc taaacccaaa
661 taactactag gttatagtaa agacgattga gtaagtcagg attgggataa aaaaaataatt
721 gaatcaataa ctctacatga atttatcttc cctctaaagt ctcatttctc attttatatt
781 tacatttata tttcataacc tctctttaa cttctcttct tactttcact cctttcccta
841 cactgttatt gtagctgtct attcgggtat ttaaattagc tatgctgaaa attacgacag
901 aatgttttta ttgcgcgtg tattttcaat tatatagtag tatttaagca tcgtcgacct
961 gcacaaaacc ctcatcgta catattttac ccatactagt tgaaaatttt tttttttttt
1021 gctctgcggg tgagggggcg ttgcccata tataaggagt ggcccttgct ttagacaaaa
1081 attttccagg ttataagttt ttttttttct ttcttctttt acttcatcta aactaaactt
1141 aattaaaaat gggtaagat aagaatcacg ttaacgtcgt cgtcattggg cactgcgatt

1201 ccggttaagtc aaccactact ggtcacttaa ttttcaagtg tgggtggtatt gataagagaa
1261 ctattgaaaa gttcgaaaag gaagctaattg aattaggaaa aggttctttc aagtacgctt
1321 gggtttttaga caagcttaag gctgaaagag aaagagggtat cactattgat attgctttat
1381 ggaagttcga aactccaaag tatcacgtta ctgttattga tgctccaggc cacagagatt
1441 tcattaagaa tatgattact ggtacttctc aagctgattg tgctgtttta attattgctg
1501 gtggtattgg tgaattcgaa gccggtattt ctaaggatgg tcaaaccaga gaacatgctt
1561 tattagctta caccttaggt gttaaacaaat taattgttgc tgtcaacaag atggattccg
1621 ttaaattggga taaggctaga tttgaagaaa tttcaaagga aacctctaatt ttogttaaga
1681 aggttggtta caatccaaag actgttccat tcgttccaat ctctggttgg aatggtgata
1741 acatgattga accatctgct aactgtccat ggtacaaggg ttgggaaaag gaaaccaagg
1801 ccggttaaggt cactggtaag actttattag atgctattga tgctattgaa ccacctcaaa
1861 gaccaactga taagccatta agattaccat tacaagatgt ttacaagatt ggtggtattg
1921 gaactgtgcc agttggtaga gttgaaaccg gtatcattaa ggctggtatg gttgtgtgtt
1981 tcgccccagc tgggtgttacc actgaagtc aatgcgttga aatgcacat gaacaattag
2041 ttgaagggtg tccagggtgac aatgttggtt tcaatgttaa gaatgtttcc gttaaggaaa
2101 ttagaagagg taacgtttgt ggtgacacca aggttgatcc accaaaggct gctgcttcac
2161 tcaatgctca agttattgtc ttaaaccatc caggtcaaatt ttctgctggt tactctccag
2221 ttttagattg tcacaccgcc catattgctt gtaagttcga tcacttagtt gaaaagattg
2281 atagaagaac tggtaagtca atggaagatg aaccaaatt catcaagtcc ggtgatgctg
2341 ctattgttag aatggtecca tccaagccaa tgtgtgttga agctttcact gactaccac
2401 cattaggtag attcgtgtt agagatatga gacaaactgt cgctgctggt gttatcaagt
2461 ctgttgacaa gtccgacaag gttggttaagg tcaccaagtc tgctgttaag gctgctaaga
2521 agtaacaac ctagtcttacc tttgatgtaa gtagtttttc tttgactaat gtatgaaatt
2581 aaatatatat aaaaaaaaag tagaaatgag cgtattatgt aactgtttgc tgcgaaaaat
2641 cgtattatag gtgaattact gtgaaatatg tcttaattat tatgtcactc gagccacaaa
2701 tgtgatttat gattttatta aacaaaagag tataatgtga tatttaggat aaaacaaaat
2761 ttggcatgtt aagggttcta agaggtttat atctatgcac ggagaaaaaa gtaaaagaag
2821 ttcatagtgt tgcagcgaat aaattttttg aataaaatca atcggaatta gtaaccttct
2881 tttatgcagc taaattatat taaaggggtac ctacagctga gttggattac gttggaatgt

```

Figure S5: Nucleotide sequence of the *C. santamariae* strain G12 *TEF1* gene (bold text) with 5' and 3'-flanking regions. The putative promoter sequence is blue.

```

1   tttacgtctg ttttatatct agcggactta tccgggtgag gcgggcacaa tccgaaactc
61  gaaccaaaca atttctcact cgaccgggtc gacgaataag aattgaaaaa atagtaattt
121 gacctgtata taaccgtttt tagatgatta aaaatttcac gtttagcggg aattttgtgt
181 aataatagat gattctaata tataagttaa aagtttccag aatgttatct ttttgcgggt
241 ttcacttttc tttttttttt cttttcttct cctaacatac atacatacaa ttaatcatgc
301 cagctccatt tgaacaagg tccgaaaaga aggggtgctac tctcttttaa actagatggt
361 tacaatgtca caccgttgaa aaagggtggtc caaacaagg tgggtccaaat ttacatgggt
421 tcttttggtg aaaatctggt ttagcagatg gtttctctta tactgatgct aacaagaaga
481 aggggtgttac ttggtctgaa caaacatgt ctgattactt agaaaaccca aagaagtata
541 ttccagggtac caagatgggt ttcgggtggt taaagaaacc aaaagacaga aacgatttag
601 tcacttactt agcaagtgt accaaataga tttagaacac tctagataag caaaagcaaa
661 ataaaagcga aatgctctgt atataataat ttatgtttta tttaatgata gagtgtagag
721 agtgagagag attgtaagcc cccagaaaat gaagaaaaat atttattgat gaagatgaga
781 atacttttat gagaccctcc atgggttgc ttagtcaagg gagatgcagt tttgcatgag
841 atcgagatta cttatcctag aagttgaatt tataataggc gtattagagg tagaaaatag
901 cactttttta agaataactt gaataatctc cattaatcaa aaacacaaac attactaag
961 cgtgtcatat tttacttttt tctataatca tctctatcgc ctttttcttt tttttctcag
1021 attctatttc tcaaacacac tctcttgatc tctcactctc actttcactc tttgacttgt
1081 ttcactctgaa aaatcctgca tatgtgcaac tagtgtttcg atatctcgat ctgtaccttc
1141 ttgactaacc gctctttcac ttctctttcg tcaaacttcg cttacattat aat

```

Figure S6: Nucleotide sequence of the *C. santamariae* strain G12 *CYC1* gene (bold text) with 5' and 3'-flanking regions. The putative transcriptional terminator sequence is brown.

**Table S1.** Extracellular proteolytic activity and concentration of extracellular proteins of yeast strains isolated from soil samples collected from various sampling sites in Antarctica <sup>1</sup> after 72 h of cultivation.

| Yeast strain                                    | Proteolytic activity at<br>pH 7.0 (nmol/mL × min) | Proteolytic activity at<br>pH 4.0 (nmol/mL × min) | Extracellular proteins<br>concentration (mg/mL) |
|-------------------------------------------------|---------------------------------------------------|---------------------------------------------------|-------------------------------------------------|
| <i>Debaryomyces</i><br><i>macquariensis</i> D50 | 6.30                                              | 7.50                                              | 0.030                                           |
| <i>Debaryomyces hansenii</i><br>IBT-D1          | 6.97                                              | 3.20                                              | 0.032                                           |
| <i>Goffeauzyma gastrica</i> IBT-<br>D7          | 21.11                                             | 8.68                                              | 0.060                                           |
| <i>Goffeauzyma gilvescens</i><br>IBT-D13        | 16.18                                             | 8.56                                              | 0.096                                           |
| <i>Goffeauzyma gilvescens</i><br>IBT-D15        | 11.45                                             | 12.36                                             | 0.112                                           |
| <i>Goffeauzyma gilvescens</i><br>IBT-D16        | 11.84                                             | 14.54                                             | 0.136                                           |
| <i>Goffeauzyma gilvescens</i><br>IBT-D20        | 15.98                                             | 24.47                                             | 0.122                                           |
| <i>Goffeauzyma gilvescens</i><br>IBT-D60        | 13.02                                             | 15.79                                             | 0.178                                           |
| <i>Leuconurospora</i> sp. IBT-<br>D59           | 38.63                                             | 17.70                                             | 0.362                                           |
| <i>Naganishia globosa</i> IBT-<br>D37           | 17.76                                             | 8.90                                              | 0.158                                           |
| <i>Naganishia adeliensis</i> IBT-<br>D58        | 11.45                                             | 12.43                                             | 0.215                                           |
| <i>Naganishia albida</i> IBT-D62                | 27.60                                             | 18.30                                             | 0.329                                           |

|                                            |       |       |       |
|--------------------------------------------|-------|-------|-------|
| <i>Rhodotorula mucilaginosa</i><br>IBT-D12 | 28.22 | 17.50 | 0.150 |
| <i>Rhodotorula mucilaginosa</i><br>IBT-D34 | 18.55 | 12.17 | 0.105 |
| <i>Rhodotorula mucilaginosa</i><br>IBT-D38 | 18.29 | 8.29  | 0.099 |

---

<sup>1</sup> Białkowska, A.M.; Szulczewska, K.M.; Krysiak, J.; Florczak, T.; Gromek, E.; Kassassir, H.; Kur, J.; Turkiewicz, M. Genetic and biochemical characterization of yeasts isolated from Antarctic soil samples. *Polar Biol.* **2017**, *40*, 1787-1803, doi: 10.1007/s00300-017-2102-7.
